# Supplementary material for: Elongator Protein 3 (Elp3) stabilizes Snail1 and regulates neural crest migration in Xenopus
Source: PubMed Central journal article supplement (PMC4870573; doi:10.1038/srep26238), 2016-05-18
Supplement: srep26238-s1.pdf [file srep26238-s1.pdf]

## Supplemental Information

### Elongator Protein 3 (Elp3) stabilizes Snail1 and regulates neural crest migration in *Xenopus*

Xiangcai Yang, Jiejing Li, Wanli, Zeng, Chaocui Li, Bingyu Mao

Figure S1

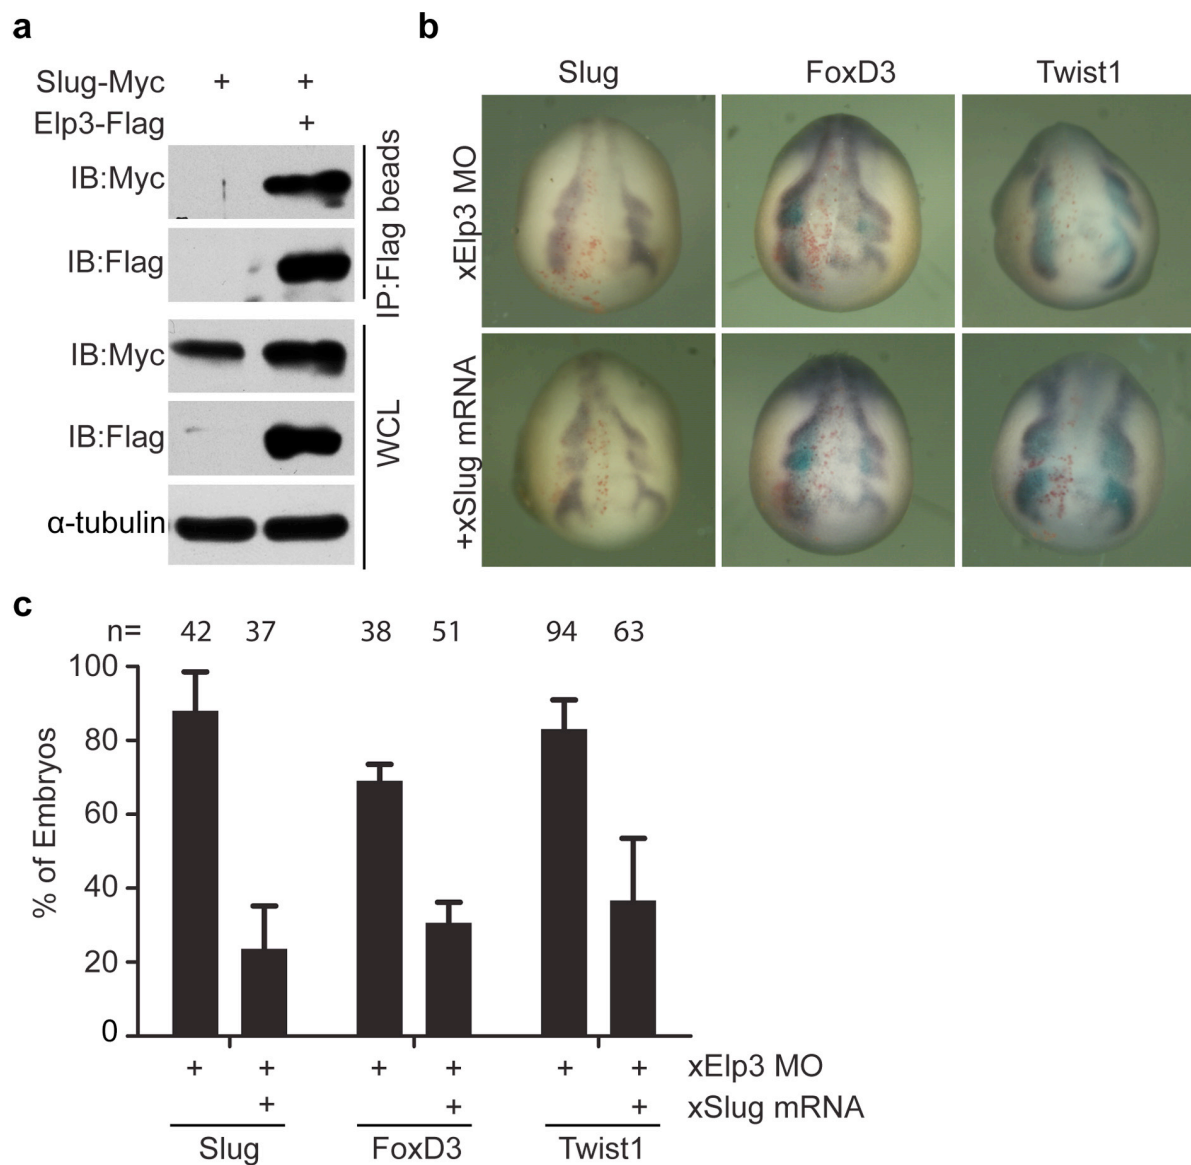

**Figure S1 Elp3 interacts with xSlug and xSlug rescues neural crest migration in the Elp3 morphants.** (a) mElp3 pulls down xSlug in co-IP experiment when co-expressed in HEK 293 cells. *WCL*, whole cell lysate. *IB*, immunoblot. *IP*, immunoprecipitation. (b) Co-expression of

xSlug mRNA (150 pg/cell at 4-cell stage) in *Xenopus* embryo restored neural crest migration in *Elp3* morphants. Whole-mount in situ hybridization with probes for neural crest markers was processed at St.19-21. LacZ mRNA was co-injected to trace the injected sides (stained red on the left sides). **(c)** Percentages of embryos with reduced migration of neural crest as shown in **(b)**. The results are from three independent experiments (error bars represent SDs).
